# Supplementary material for: Molecular origin of high-concentration cellulose dissolution in organic acid media: a combined experimental and computational study
Source: Royal Society of Chemistry journal article supplement (doi:10.1039/d5cp04137f), 2025-12-16
Supplement: d5cp04137f1.pdf [file d5cp04137f1.pdf]

## Electronic Supplementary Information

# Molecular Origin of High-Concentration Cellulose Dissolution in Organic Acid Media: A Combined Experimental and Computational Study

*Kanta Hayashi,<sup>a</sup> Tomoya Tashiro,<sup>a</sup> Tomohiro Hashizume,<sup>b</sup> Takashi Watanabe,<sup>c,d</sup> and Kenta Fujii<sup>a\*</sup>*

*<sup>a</sup> Graduate School of Sciences and Technology for Innovation, Yamaguchi University, 2-16-1 Tokiwadai, Ube, Yamaguchi 755-8611, Japan. <sup>b</sup> Daicel Corporation, Ofuka-Cho, Kita-Ku, Osaka 530-0011, Japan. <sup>c</sup> Research Institute for Sustainable Humanosphere, Kyoto University, Uji, Kyoto 611-0011, Japan. <sup>d</sup> Biomass Product Tree Industry-Academia Collaborative Research Laboratory, Kyoto University, Uji, Kyoto 611-0011, Japan.*

*\* To whom correspondence should be addressed. E-mail: k-fujii@yamaguchi-u.ac.jp*

## Experimental and Computational Methods.

*High-energy X-ray total scattering (HEXTS).* HEXTS measurements were conducted at ambient temperature using a high-energy X-ray diffraction apparatus installed at SPring-8 (BL04B2 beamline, JASRI, Japan). Monochromatized 61.19 keV X-rays were obtained using a Si(220) monochromator. The observed X-ray scattering intensities were corrected for absorption, polarization, and incoherent scattering to determine coherent scattering intensities,  $I_{\text{coh}}(q)$ .<sup>1-3</sup> The experimental X-ray structure factor per stoichiometric volume,  $S^{\text{exp}}(q)$ , was obtained using the following equation:

$$S^{\text{exp}}(q) = \frac{\frac{I_{\text{coh}}(q)}{N} - \sum n_i f_i(q)^2}{\{\sum n_i f_i(q)\}^2} + 1 \quad (\text{S1}),$$

where  $n_i$  and  $f_i(q)$  correspond to the number and atomic scattering factor of atom  $i$ , respectively, and  $N$  is the total number of atoms in the stoichiometric volume. The radial distribution function,  $G^{\text{exp}}(r)$  is obtained using the Fourier transform of the  $S^{\text{exp}}(q)$  as follows:

$$G^{\text{exp}}(r) - 1 = \frac{1}{2\pi^2 r \rho_0} \int_0^{q_{\text{max}}} q \{S^{\text{exp}}(q) - 1\} \sin(qr) W(q) dq \quad (\text{S2}),$$

where  $\rho_0$  is the number density of atoms,  $q_{\text{max}}$  is the maximum value of  $q$  ( $25 \text{ \AA}^{-1}$  in this study), and  $W(q)$  corresponds to the Lorch window function.<sup>4</sup>

**Table S1.** Concentrations (weight percent and molarity), density ( $d$ ) and refractive index ( $n_2$ ) of CB/FA, CL/FA, CB/PA, and CL/PA solutions.  $c_{\text{CB}}$  and  $c_{\text{CB}}'$  denote the molarity of CB and the CB dimer-equivalent molarity of CL.

| CB/FA solutions               |                                       |                        |       |
|-------------------------------|---------------------------------------|------------------------|-------|
| $w_{\text{CB}} / \text{wt}\%$ | $c_{\text{CB}} / \text{mol dm}^{-3}$  | $d / \text{g cm}^{-3}$ | $n_2$ |
| 0                             | 0                                     | 1.211                  | 1.368 |
| 20                            | 0.614                                 | 1.261                  | 1.397 |
| 30                            | 0.872                                 | 1.293                  | 1.406 |
| 40                            | 1.090                                 | 1.306                  | 1.417 |
| 50                            | 1.284                                 | 1.318                  | 1.422 |
| CL/FA solutions               |                                       |                        |       |
| $w_{\text{CL}} / \text{wt}\%$ | $c_{\text{CB}}' / \text{mol dm}^{-3}$ | $d / \text{g cm}^{-3}$ | $n_2$ |
| 5                             | 0.179                                 | 1.219                  | 1.378 |
| 10                            | 0.346                                 | 1.235                  | 1.384 |
| 15                            | 0.500                                 | 1.243                  | 1.391 |
| 20                            | 0.644                                 | 1.252                  | 1.396 |
| 25                            | 0.780                                 | 1.264                  | 1.401 |

| CB/PA solutions               |                                      |                        |       |
|-------------------------------|--------------------------------------|------------------------|-------|
| $w_{\text{CB}} / \text{wt}\%$ | $c_{\text{CB}} / \text{mol dm}^{-3}$ | $d / \text{g cm}^{-3}$ | $n_2$ |
| 0                             | 0                                    | 1.271                  | 1.399 |
| 5                             | 0.178                                | 1.276                  | 1.426 |
| 10                            | 0.343                                | 1.295                  | 1.438 |
| 15                            | 0.496                                | 1.299                  | 1.432 |
| 20                            | 0.641                                | 1.314                  | 1.431 |
| 25                            | 0.773                                | 1.320                  | 1.422 |

  

| CL/PA solutions               |                                       |                        |       |
|-------------------------------|---------------------------------------|------------------------|-------|
| $w_{\text{CL}} / \text{wt}\%$ | $c_{\text{CB}}' / \text{mol dm}^{-3}$ | $d / \text{g cm}^{-3}$ | $n_2$ |
| 2                             | 0.075                                 | 1.240                  | 1.423 |
| 4                             | 0.147                                 | 1.245                  | 1.431 |
| 6                             | 0.219                                 | 1.253                  | 1.433 |
| 8                             | 0.289                                 | 1.269                  | 1.435 |
| 10                            | 0.362                                 | 1.287                  | 1.437 |

**Table S2.** Compositions (number of CB, FA, and PA) of the systems for MD simulations, and density ( $d$ ) in 20 wt% CB/FA and 20 wt% CB/PA solutions.

| Sample       | CB(solvent) <sub>5</sub> | FA   | PA   | $d / \text{g cm}^{-3}$ |                   |
|--------------|--------------------------|------|------|------------------------|-------------------|
|              |                          |      |      | MD <sup>a</sup>        | Exp. <sup>b</sup> |
| 20 wt% CB/FA | 139                      | 4471 | -    | 1.3583                 | 1.261             |
| 20 wt% CB/PA | 139                      | -    | 2007 | 1.3397                 | 1.314             |

<sup>a</sup> Values obtained from the present MD simulations. <sup>b</sup> Experimental values.

**Table S3.** Coordination numbers  $N(r)$  of O<sub>H</sub> atoms of solvent molecules around O<sub>X</sub> atoms of the CB(solvent)<sub>5</sub> molecules, obtained from MD simulations for 20 wt% CB/FA and CB/PA systems. The  $N(r)$  was calculated by the integration of the corresponding  $g_{\text{OX-OH}}(r)$  up to  $r = 3.0 \text{ \AA}$ , shown in Figure 11.

| O (solute)–O (solvent)         | CB/FA system | CB/PA system |
|--------------------------------|--------------|--------------|
| O <sub>1</sub> –O <sub>H</sub> | 0.99         | 0.83         |
| O <sub>2</sub> –O <sub>H</sub> | 0.51         | 0.30         |
| O <sub>3</sub> –O <sub>H</sub> | 0.86         | 0.49         |
| O <sub>4</sub> –O <sub>H</sub> | -            | 0.27         |
| Total                          | 2.36         | 1.89         |

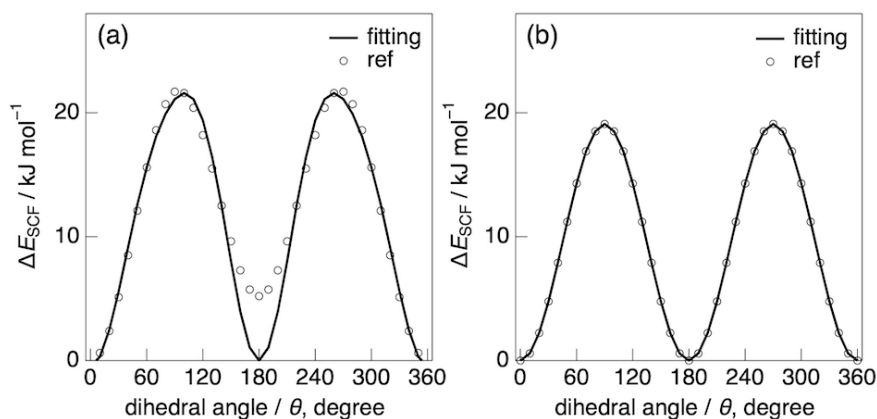

**Figure S1.** Torsion potential energy surface as a function of the (a) H–C–O–H and (b) O=C–O–H dihedral angle of FA molecule from ref 5 (open circles). The solid line shows the fitting result for the data using the following equation to determine the parameters  $V_n$  ( $n = 1, 2, 3$ , and 4). The resulting  $V_n$  values are:  $V_1 = -0.5468$  kJ mol<sup>-1</sup>,  $V_2 = 5.2941$  kJ mol<sup>-1</sup>,  $V_3 = 0.6960$  kJ mol<sup>-1</sup>, and  $V_4 = 0.5412$  kJ mol<sup>-1</sup> for H–C–O–H;  $V_1 = 0$  kJ mol<sup>-1</sup>,  $V_2 = 4.565$  kJ mol<sup>-1</sup>,  $V_3 = 0$  kJ mol<sup>-1</sup>, and  $V_4 = 0$  kJ mol<sup>-1</sup> for O=C–O–H.

$$E(\phi) = \frac{V_1}{2} [1 + \cos(\phi + f_1)] + \frac{V_2}{2} [1 - \cos(2\phi + f_2)] + \frac{V_3}{2} [1 + \cos(3\phi + f_3)] + \frac{V_4}{2} [1 - \cos(4\phi + f_4)] \quad (\text{S3}).$$

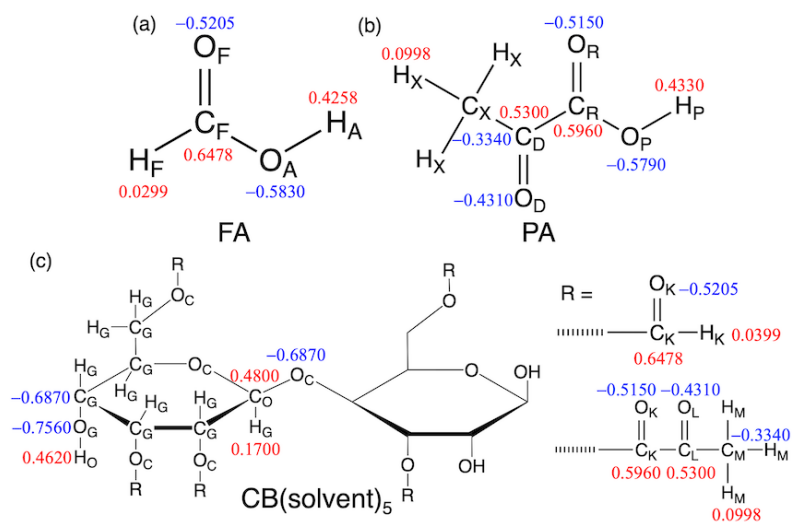

**Figure S2.** The partial charges of (a) FA, (b) PA and (c) CB(solvent)<sub>5</sub> were calculated based on the ChelpG method [MP2/cc-pVTZ(-f)/HF/6-31G(d)]. R is a substituent derived from an OH group, which is modified in the reactive solvent (FA or PA). In a formic acid system, the OH group is formylated, and the resulting R corresponds to a formyl group. In a pyruvic acid system, it is esterified, and R corresponds to an ester group.

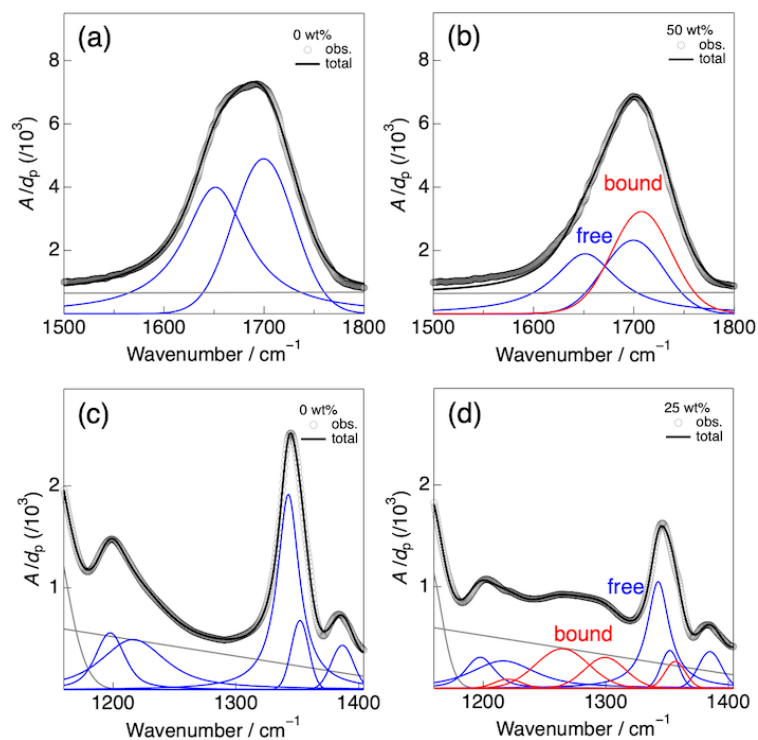

**Figure S3.** Full peak deconvolution into individual peaks for (a) neat FA and (b) 50 wt% CB/FA solution, (c) neat PA, and (d) 25 wt% CB/PA solution.

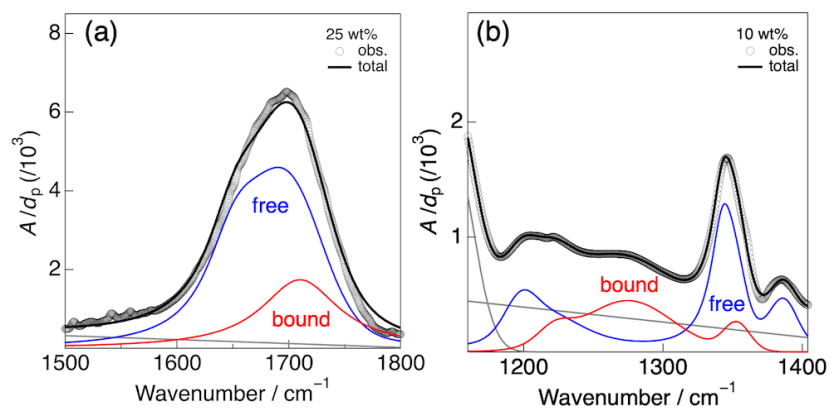

**Figure S4.** Typical peak deconvolution results for (a) 25 wt% CL/FA and (b) 10 wt% CL/PA solutions.

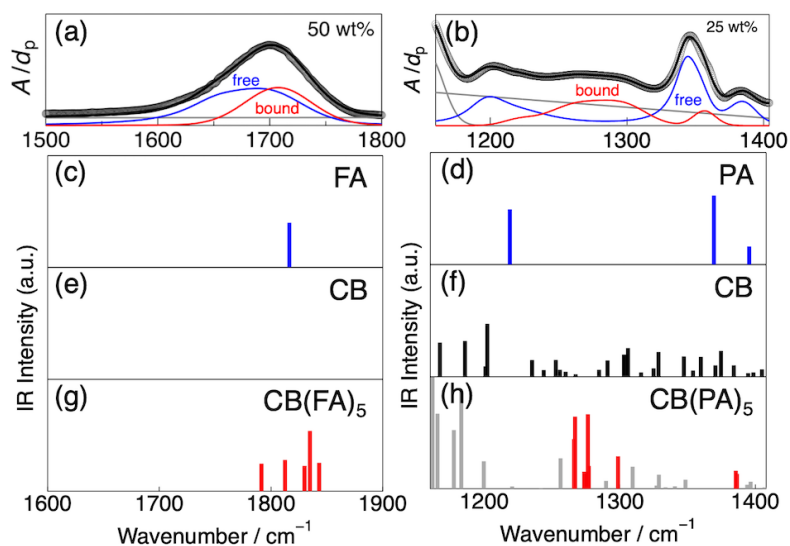

**Figure S5.** Typical peak deconvolution results for (a) 50 wt% CB/FA and (b) 25 wt% CB/PA solutions, and the theoretical IR bands for (c) FA, (d) PA, (e, f) CB, (g)  $\text{CB(FA)}_5$ , and (h)  $\text{CB(PA)}_5$  molecules.

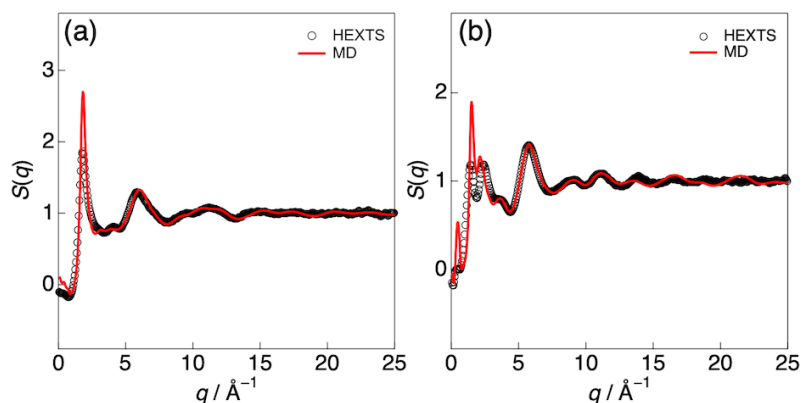

**Figure S6.** The X-ray structure factor  $S(q)$  obtained from HEXTS experiments (open circles) and MD simulations (solid line) obtained for (a) 20 wt% CB/FA and (b) 20 wt% CB/PA solutions.

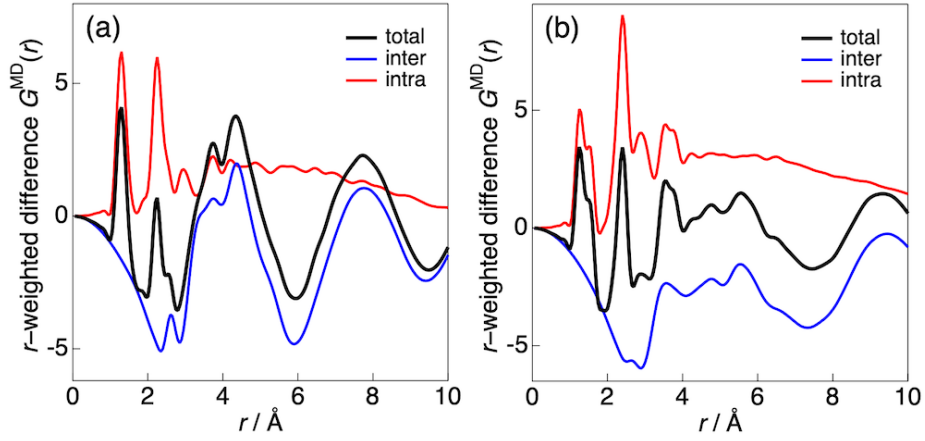

**Figure S7.**  $r^2$ -weighted partial  $G^{\text{MD}}(r)$ s for intramolecular [red;  $G^{\text{MD}}_{\text{intra}}(r)$ ] and intermolecular [blue;  $G^{\text{MD}}_{\text{inter}}(r)$ ] contributions, associated with the total profile [black; i.e.,  $G^{\text{MD}}_{\text{total}}(r) = G^{\text{MD}}_{\text{intra}}(r) + G^{\text{MD}}_{\text{inter}}(r)$ ], for (a) 20 wt% CB/FA and (b) 20 wt% CB/PA solutions.

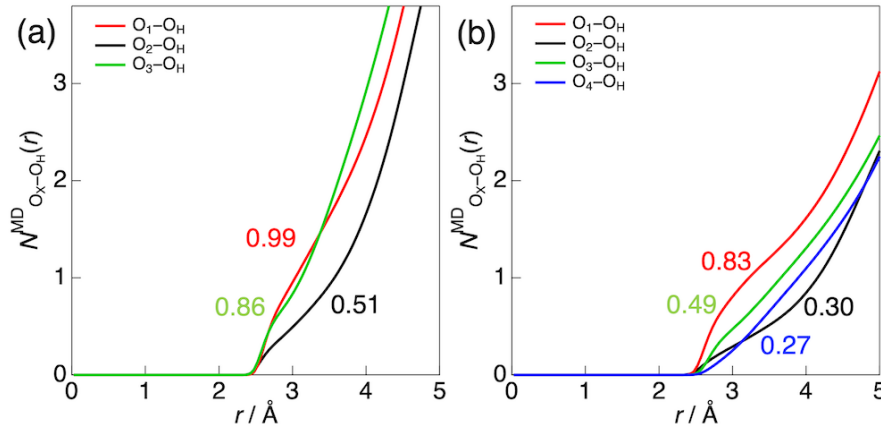

**Figure S8.** Coordination numbers  $N(r)$  obtained by integrating the radial distribution functions  $g_{\text{OX-OH}}(r)$  for  $\text{CB}(\text{solvent})_5$  in (a) formic acid (FA) and (b) pyruvic acid (PA) systems. The curves represent the cumulative numbers of solvent  $\text{O}_\text{H}$  atoms around each oxygen site ( $\text{O}_1\text{--O}_4$ ) in the chemically modified CB unit as a function of distance  $r$ . The coordination numbers at  $r = 3.0$  Å, corresponding to the number of hydrogen bonds per oxygen site, are indicated in the figure and summarized in Table S3.

## References

1. S. Sakai, *KEK Report 90-16*, National Laboratory for High Energy Physics, Tsukuba, Japan, 1990.

2. D. T. Cromer, *J. Chem. Phys.*, 1969, **50**, 4857-4859.
3. J. H. Hubbell, Wm. J. Veigele, E. A. Briggs, R. T. Brown, D. T. Cromer and R. J. Howerton, *J. Phys. Chem. Ref. Data*, 1975, **4**, 471-538.
4. K. Hirose, K. Fujii, K. Hashimoto and M. Shibayama, *Macromolecules*, 2017, **50**, 6509-6517.
5. N. Dawass, J. Langeveld, M. Ramdin, E. Perez-Gallent, A. A. Villanueva, E. J. M. Giling, J. Langerak, L. J. P. van den Broeke, T. J. H. Vlugt and O. A. Moultos, *J. Phys. Chem. B*, 2022, **126**, 3572-3584.
